# Supplementary material
Source: PubMed Central journal article supplement (PMC4643527)
Supplement: supp_dev235_dev235supp_table1.pdf [file supp_dev235_dev235supp_table1.pdf]

**Supplementary Table S1** Adjusted hazard ratios (aHR) for having a major uterine procedure associated with fibroid size at enrollment (diameter of largest fibroid) after excluding women with submucosal fibroids, National Institute of Environmental Health Sciences Uterine Fibroid Study 8-year follow-up ( $N = 777$ ).

| Fibroid size | N   | aHR <sup>a</sup> | 95% CI <sup>b</sup> |
|--------------|-----|------------------|---------------------|
| No fibroids  | 323 | 1.0              | –                   |
| <2 cm        | 127 | 2.9              | 0.9–9.0             |
| 2–3.99 cm    | 223 | 10.4             | 4.3–25.1            |
| ≥4 cm        | 104 | 31.6             | 13.0–76.9           |

<sup>a</sup>Models adjusted for age and ethnicity.

<sup>b</sup>CI, confidence interval.
